# Supplementary figures and images for: Downregulation of Glutathione-Mediated Detoxification Capacity by Binge Drinking Aggravates Acetaminophen-Induced Liver Injury through IRE1α ER Stress Signaling
Source: MDPI journal article supplement (doi:10.3390/antiox10121949), 2021-12-05

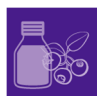

## Supplementary figure

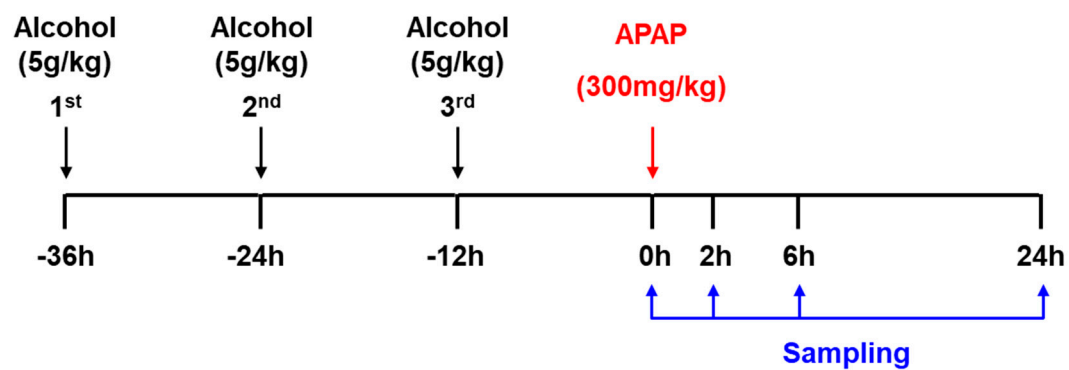

Figure S1. Experimental schedule

Supplement: s1 [file s1]
